# Supplementary material for: Bimetal oxide-derived flower-like heterogeneous Co/MnO@C composites with synergistic magnetic–dielectric attenuation for electromagnetic wave absorption
Source: Royal Society of Chemistry journal article supplement (doi:10.1039/c9tc05852d), 2020-01-01
Supplement: c9tc05852d1.pdf [file c9tc05852d1.pdf]

Supplementary Materials for

**Bimetal oxides-derived flower-like heterogeneous Co/MnO@C composites with synergistic magnetic-dielectric attenuation for electromagnetic wave absorption**

Dongmei Xu<sup>a</sup>, Nannan Wu<sup>b</sup>, Kai Le<sup>a</sup>, Fenglong Wang<sup>b</sup>, Zhou Wang<sup>b</sup>, Lili Wu<sup>b</sup>, Wei Liu<sup>\*a</sup>, Ancheng Ouyang<sup>a</sup>, and Jiurong Liu<sup>\*b</sup>

<sup>a</sup> State Key Laboratory of Crystal Materials, Institute of Crystal Materials, Shandong University, Shandong, 250100, China

<sup>b</sup> School of Materials Science and Engineering, Shandong University, Jinan, Shandong, 250061, China

\*Corresponding author.

E-mail addresses: [weiliu@sdu.edu.cn](mailto:weiliu@sdu.edu.cn)

E-mail addresses: [jrliu@sdu.edu.cn](mailto:jrliu@sdu.edu.cn)

### **Preparation of Co/MnO@C composites.**

The 3D flower-like Co/Mn precursors were prepared through a solvothermal process previously reported.<sup>1</sup> Typically, 2.67 mmol  $\text{Co}(\text{CH}_3\text{COO})_2 \cdot 4\text{H}_2\text{O}$ , 1.33 mmol  $\text{Mn}(\text{CH}_3\text{COO})_2 \cdot 4\text{H}_2\text{O}$ , and 0.8 g polyvinyl pyrrolidone (PVP, K30) were dissolved in 80 mL ethylene glycol (EG). The solution reacted at 200 °C for 24 h in a Teflon-lined stainless steel autoclave. After centrifugation and repeated washing, the precursors were dried at 60 °C for 12 h. Afterwards, the  $\text{MnCo}_2\text{O}_4$  microspheres were obtained by calcinating the precursors in air at 400 °C for 1 h. In order to get the 3D flower-like Co/MnO@C composites, 0.88 g  $\text{MnCo}_2\text{O}_4$  powder was mixed with 0.5 mL pyrrole in a stainless steel autoclave and reacted at 570 °C for 5 h. The sample with an initial addition ratio of cobalt salt and manganese salt equaling 1:2 was also prepared in the same method. The obtained samples with different element ratio were denoted as MC2@C and CM2@C, respectively. The precursor of Co@C and pure Co was prepared through the same method without the addition of manganese salt. The reduction condition of Co@C kept consistent with Co/MnO@C composite. The pure Co particles were prepared by the hydrogen reduction at 350 °C for 1.5 h.

### **Preparation of MnO@C composites.**

The MnO@C composites with the similar size and morphology were also prepared as the control sample.<sup>2</sup> 1.5 g PVP (K30), 3 mmol  $\text{Mn}(\text{Ac})_2 \cdot 4\text{H}_2\text{O}$  and 3 mmol urea were firstly dissolved in 60 mL diethylene glycol (DEG) under magnetic stirring. The mixture solution was then transferred into a 100 mL Teflon-lined stainless steel autoclave and reacted at 200 °C for 24 h in an oven. After the reaction, the brown

precipitate was centrifuged and washed with ethanol. And then the product was dried in an oven at 60 °C for 12h. After annealing at 400 °C for 1 h in air, the Mn<sub>2</sub>O<sub>3</sub> microspheres were obtained. To obtain the MnO@C microspheres, 0.88 g Mn<sub>2</sub>O<sub>3</sub> power was mixed with 0.5 mL pyrrole in a stainless steel autoclave and reacted at 570 °C for 5 h.

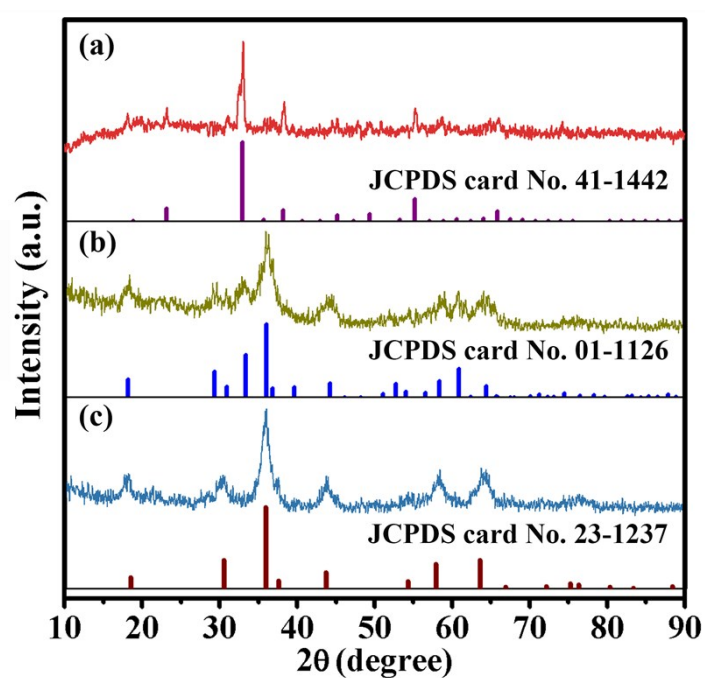

**Fig. S1** XRD patterns of Mn<sub>2</sub>O<sub>3</sub> (a), CoMn<sub>2</sub>O<sub>4</sub> (b) and MnCo<sub>2</sub>O<sub>4</sub> (c).

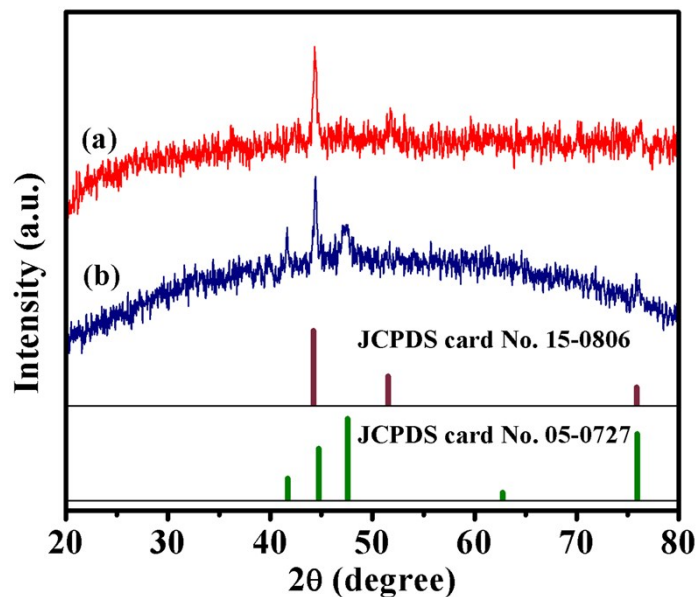

**Fig. S2** XRD patterns of Co@C composites (a) and pure Co (b).

The XRD pattern of Co@C (**Fig. S2a**) indicated that the precursor was completely reduced to the face-centered cubic Co (JCPDS card No. 15-0806). While under the hydrogen reduction, both face-centered cubic Co (JCPDS card No. 15-0806) and hexagonal close-packed Co (JCPDS card No. 05-0727) were produced simultaneously.

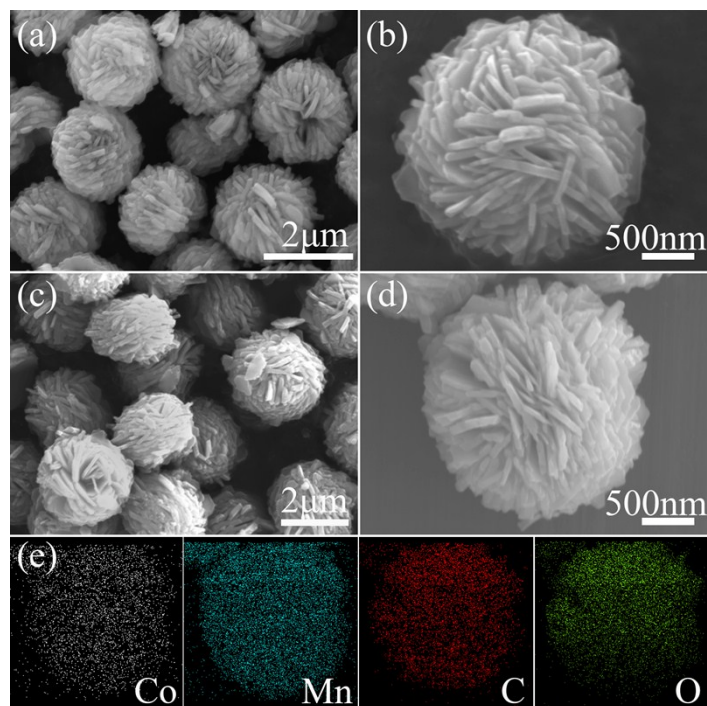

**Fig. S3** SEM images of CM2@C precursors (a, b), CM2@C (c, d) and elemental

mapping of CM2@C (e).

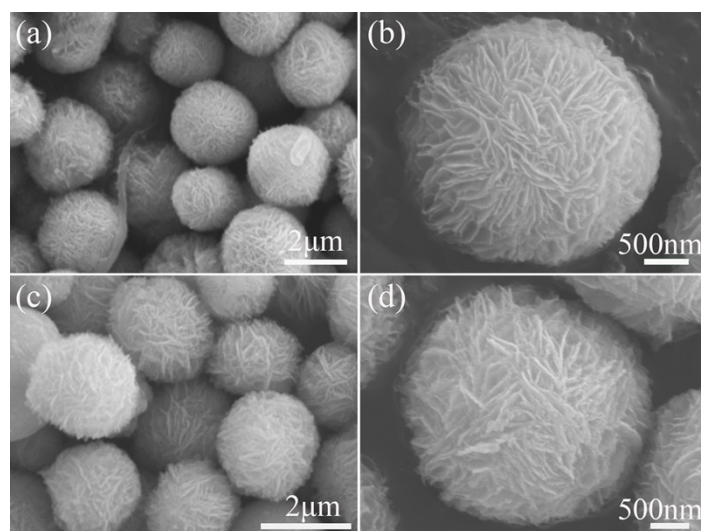

**Fig. S4** SEM images of MnO@C precursor (a, b) and MnO@C (c, d).

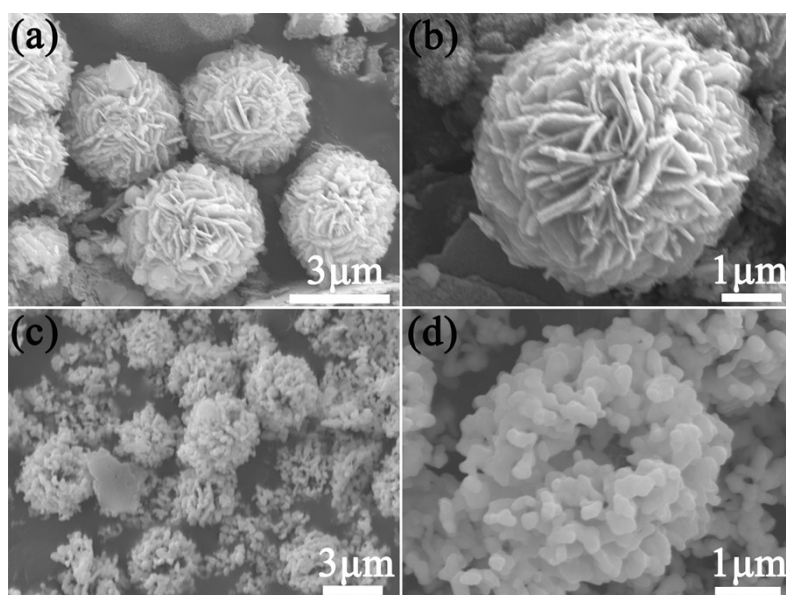

**Fig. S5** SEM images of Co@C composites (a, b) and pure Co (c, d).

**Table S1.** The conductivity of MnO@C, CM2@C and MC2@C composites.

| Sample                 | MnO@C                 | CM2@C                 | MC2@C                 |
|------------------------|-----------------------|-----------------------|-----------------------|
| Conductivity<br>(S/cm) | $2.76 \times 10^{-6}$ | $1.76 \times 10^{-5}$ | $5.73 \times 10^{-5}$ |

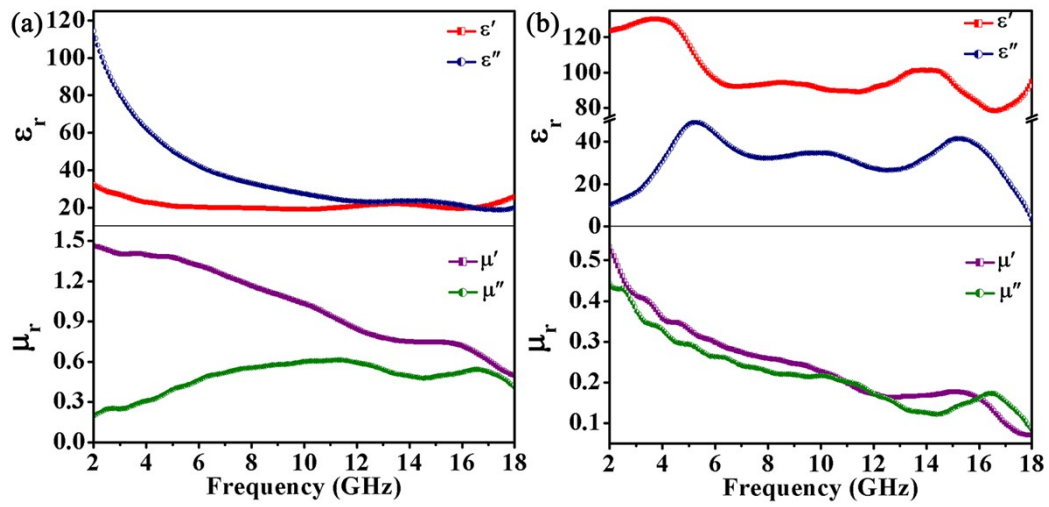

**Fig. S6** The relative complex permittivity and permeability of Co@C (a) and Co (b) specimens.

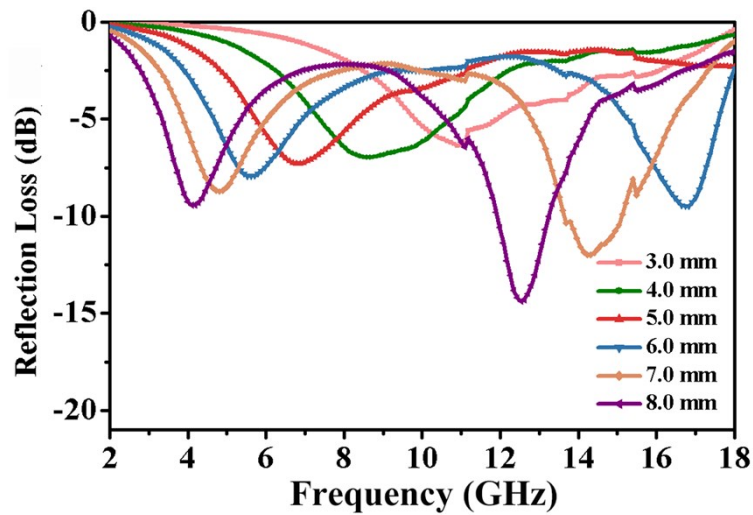

**Fig. S7** The RL plots under specified thicknesses of MnO@C in 2-18 GHz.

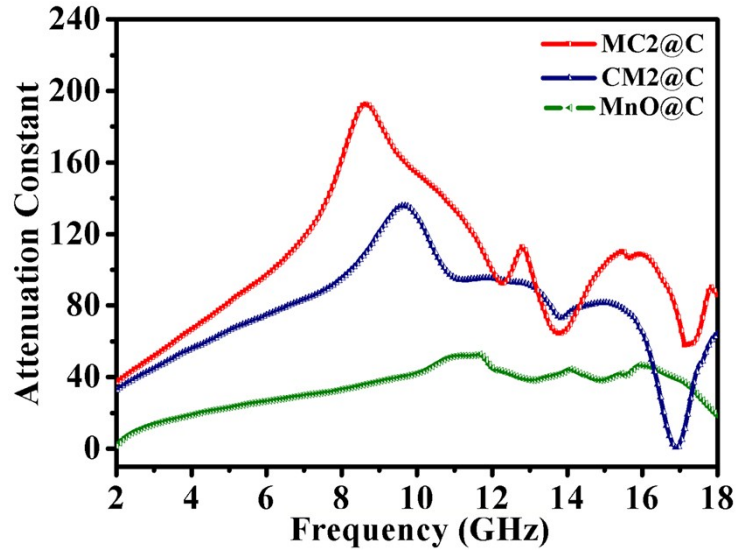

**Fig. S8** Attenuation coefficients ( $\alpha$ ) of MnO@C, CM2@C and MC2@C against frequency.

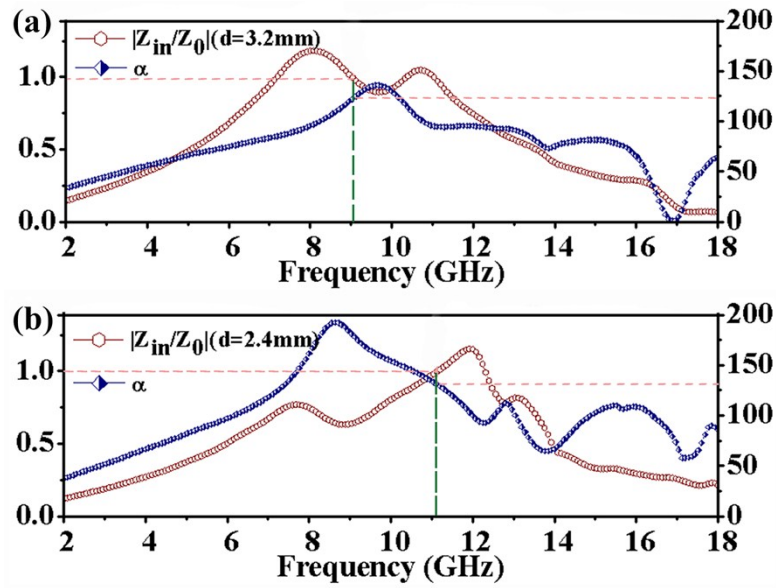

**Fig. S9** Impedance matching ( $|Z_{in}/Z_0|$ ) curves under the optimal thicknesses and attenuation coefficients ( $\alpha$ ) of CM2@C (a) and MC2@C (b).

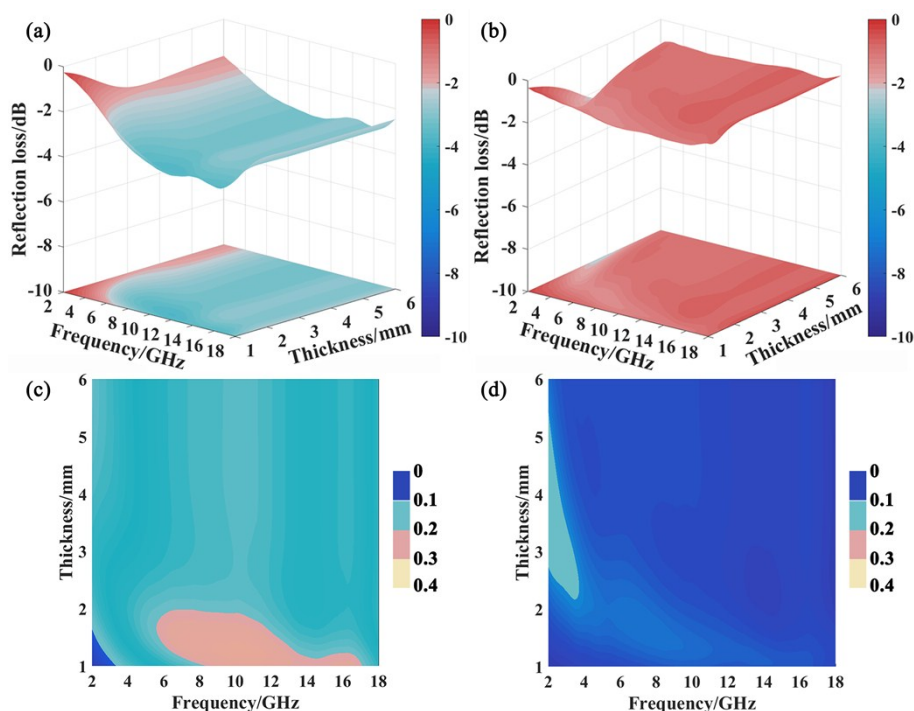

**Fig. S10** Three-dimensional RL maps and the corresponding impedance matching maps of Co@C (a, c) and Co (b, d) specimens in 2-18 GHz.

The relative complex permittivity ( $\epsilon_r = \epsilon' - j\epsilon''$ ) and the relative complex permeability ( $\mu_r = \mu' - j\mu''$ ) of Co@C and Co specimens with the same mass loading were displayed in **Fig. S6**. Apparently, these two samples show much larger  $\epsilon''$  and  $\mu''$  values than Co/MnO@C composites, which represents the higher attenuation capability. However, the three-dimensional RL maps (**Fig. S10**) indicate that the EMW absorption performance of these two specimens is poor. The impedance matching maps of Co@C and Co specimens give the clue of poor performance. As shown in **Fig. S10**, the  $Z$  values (impedance matching values) of Co@C and Co specimens are located in the range of 0~0.3 and 0~0.2, respectively, which are far from the ideal impedance matching value ( $Z=1$ ). This impedance mismatch results from the excessively high permittivity due to the large conductivity of Co.



## References

- 1 Y. Jin, L. Wang, Q. Jiang, X. Du, C. Ji and X. He, *Materials Letters*, 2016, **177**, 85-88.
- 2 S. Guo, G. Lu, S. Qiu, J. Liu, X. Wang, C. He, H. Wei, X. Yan and Z. Guo, *Nano Energy*, 2014, **9**, 41-49.
